# Supplementary material for: Ecological Distribution and Oenological Characterization of Native Saccharomyces cerevisiae in an Organic Winery
Source: MDPI journal article supplement (doi:10.3390/fermentation8050224), 2022-05-13
Supplement: s1 [file s1]

**Table S1.** Source and Biotype of native *S. cerevisiae* strains. Biotype combination coming from the match of both profiles delta12/21 and ISSR. In particular, combining delta12/21 profile (I) and ISSR profile (I) it was obtained the Biotype **I**; in the same way, delta12/21 profile (II) and ISSR profile (I) it was obtained the Biotype **II**; delta12/21 profile (II) and ISSR profile (IV) it was obtained the Biotype **III**; delta12/21 profile (I) and ISSR profile (III) it was obtained the Biotype **IV**; delta12/21 profile (IV) and ISSR profile (I) it was obtained the Biotype **V**; delta12/21 profile (I) and ISSR profile (IV) it was obtained the Biotype **VI**; delta12/21 profile (III) and ISSR profile (I) it was obtained the Biotype **VII**; delta12/21 profile (V) and ISSR profile (I) it was obtained the Biotype **VIII**; delta12/21 profile (VI) and ISSR profile (II) it was obtained the Biotype **IX**.

| Sampling year | Source of <i>S. cerevisiae</i> isolates | Isolates code | Biotype combination | delta12/21 profile | ISSR profile |
|---------------|-----------------------------------------|---------------|---------------------|--------------------|--------------|
| 2016          | Montepulciano grape - sample n.8        | M8_1          | <b>I</b>            | <b>I</b>           | <b>I</b>     |
|               | Montepulciano grape - sample n.8        | M8_2          | <b>I</b>            | <b>I</b>           | <b>I</b>     |
|               | Montepulciano grape - sample n.8        | M8_3          | <b>I</b>            | <b>I</b>           | <b>I</b>     |
|               | Montepulciano grape - sample n.8        | M8_4          | <b>I</b>            | <b>I</b>           | <b>I</b>     |
|               | Montepulciano grape - sample n.8        | M8_5          | <b>I</b>            | <b>I</b>           | <b>I</b>     |
|               | Montepulciano grape - sample n.9        | M9_1          | <b>IV</b>           | <b>I</b>           | <b>III</b>   |
|               | Montepulciano grape - sample n.9        | M9_2          | <b>I</b>            | <b>I</b>           | <b>I</b>     |
|               | Montepulciano grape - sample n.9        | M9_3          | <b>VI</b>           | <b>I</b>           | <b>IV</b>    |
|               | Montepulciano grape - sample n.9        | M9_4          | <b>III</b>          | <b>II</b>          | <b>IV</b>    |
|               | Montepulciano grape - sample n.9        | M9_5          | <b>III</b>          | <b>II</b>          | <b>IV</b>    |
|               | Verdicchio spontaneous fermentation     | V_V5          | <b>I</b>            | <b>I</b>           | <b>I</b>     |
|               | Verdicchio spontaneous fermentation     | V_V6          | <b>I</b>            | <b>I</b>           | <b>I</b>     |
|               | Verdicchio spontaneous fermentation     | V_V7          | <b>I</b>            | <b>I</b>           | <b>I</b>     |
|               | Verdicchio spontaneous fermentation     | V_C8          | <b>II</b>           | <b>II</b>          | <b>I</b>     |
|               | Verdicchio spontaneous fermentation     | V_C9          | <b>II</b>           | <b>II</b>          | <b>I</b>     |
|               | Verdicchio spontaneous fermentation     | V_C10         | <b>II</b>           | <b>II</b>          | <b>I</b>     |
|               | Verdicchio spontaneous fermentation     | V_PV1         | <b>II</b>           | <b>II</b>          | <b>I</b>     |
|               | Verdicchio spontaneous fermentation     | V_PV2         | <b>II</b>           | <b>II</b>          | <b>I</b>     |
|               | Verdicchio spontaneous fermentation     | V_PV3         | <b>II</b>           | <b>II</b>          | <b>I</b>     |
|               | Verdicchio spontaneous fermentation     | V_PV4         | <b>II</b>           | <b>II</b>          | <b>I</b>     |
|               | Verdicchio spontaneous fermentation     | VFF_1         | <b>I</b>            | <b>I</b>           | <b>I</b>     |
|               | Verdicchio spontaneous fermentation     | VFF_2         | <b>VII</b>          | <b>III</b>         | <b>I</b>     |
|               | Verdicchio spontaneous fermentation     | VFF_3         | <b>I</b>            | <b>I</b>           | <b>I</b>     |
|               | Verdicchio spontaneous fermentation     | VFF_4         | <b>I</b>            | <b>I</b>           | <b>I</b>     |

|      |                                      |        |     |    |    |
|------|--------------------------------------|--------|-----|----|----|
|      | Verdicchio spontaneous fermentation  | VFF_5  | I   | I  | I  |
|      | Verdicchio spontaneous fermentation  | VFF_6  | I   | I  | I  |
|      | Verdicchio spontaneous fermentation  | VFF_7  | I   | I  | I  |
|      | Verdicchio spontaneous fermentation  | VFF_8  | I   | I  | I  |
|      | Verdicchio spontaneous fermentation  | VFF_9  | V   | IV | I  |
|      | Verdicchio spontaneous fermentation  | VFF_10 | I   | I  | I  |
|      | Winery environment - floor           | PAV_1  | I   | I  | I  |
|      | Winery environment - floor           | PAV_2  | I   | I  | I  |
|      | Winery environment - floor           | PAV_3  | I   | I  | I  |
|      | Winery environment - floor           | PAV_4  | I   | I  | I  |
|      | Winery environment - floor           | PAV_5  | I   | I  | I  |
|      | Winery environment - wall            | MUR_1  | I   | I  | I  |
|      | Winery environment - wall            | MUR_2  | I   | I  | I  |
|      | Winery environment - wall            | MUR_3  | II  | II | I  |
|      | Winery equipment - fermentation tank | TIN_2  | I   | I  | I  |
|      | Winery equipment - fermentation tank | TIN_3  | I   | I  | I  |
|      | Winery equipment - fermentation tank | TIN_4  | I   | I  | I  |
|      | Winery equipment - fermentation tank | TIN_5  | I   | I  | I  |
|      | Winery equipment - fermentation tank | VAL_1  | I   | I  | I  |
| 2019 | Verdicchio grape - sample n.1        | U1_1   | I   | I  | I  |
|      | Verdicchio grape - sample n.1        | U1_2   | I   | I  | I  |
|      | Verdicchio grape - sample n.1        | U1_3   | I   | I  | I  |
|      | Verdicchio grape - sample n.1        | U1_4   | I   | I  | I  |
|      | Verdicchio grape - sample n.1        | U1_5   | I   | I  | I  |
|      | Verdicchio grape - sample n.1        | U1_6   | I   | I  | I  |
|      | Verdicchio grape - sample n.1        | U1_7   | I   | I  | I  |
|      | Verdicchio grape - sample n.2        | U2_7_1 | II  | II | I  |
|      | Verdicchio grape - sample n.2        | U2_7_2 | II  | II | I  |
|      | Verdicchio grape - sample n.2        | U2_7_3 | II  | II | I  |
|      | Verdicchio grape - sample n.2        | U2_7_4 | II  | II | I  |
|      | Verdicchio grape - sample n.2        | U2_7_5 | II  | II | I  |
|      | Verdicchio grape - sample n.2        | U2_7_6 | II  | II | I  |
|      | Verdicchio grape - sample n.2        | U2_7_7 | III | II | IV |
|      | Verdicchio grape - sample n.2        | U2_7_8 | II  | II | I  |

|                                     |          |      |    |     |
|-------------------------------------|----------|------|----|-----|
| Verdicchio grape - sample n.2       | U2_7_9   | II   | II | I   |
| Verdicchio grape - sample n.2       | U2_7_10  | II   | II | I   |
| Verdicchio grape - sample n.2       | U2_15_1  | II   | II | I   |
| Verdicchio grape - sample n.2       | U2_15_2  | II   | II | I   |
| Verdicchio grape - sample n.2       | U2_15_3  | II   | II | I   |
| Verdicchio grape - sample n.2       | U2_15_4  | II   | II | I   |
| Verdicchio grape - sample n.2       | U2_15_5  | II   | II | I   |
| Verdicchio grape - sample n.2       | U2_15_6  | II   | II | I   |
| Verdicchio grape - sample n.2       | U2_15_7  | II   | II | I   |
| Verdicchio grape - sample n.2       | U2_15_8  | II   | II | I   |
| Verdicchio grape - sample n.2       | U2_15_9  | II   | II | I   |
| Verdicchio grape - sample n.2       | U2_15_10 | II   | II | I   |
| Verdicchio spontaneous fermentation | PD_1     | II   | II | I   |
| Verdicchio spontaneous fermentation | PD_2     | VIII | V  | I   |
| Verdicchio spontaneous fermentation | PD_3     | I    | I  | I   |
| Verdicchio spontaneous fermentation | PD_4     | I    | I  | I   |
| Verdicchio spontaneous fermentation | PD_5     | II   | II | I   |
| Verdicchio spontaneous fermentation | PD_6     | IV   | I  | III |
| Verdicchio spontaneous fermentation | PD_7     | I    | I  | I   |
| Verdicchio spontaneous fermentation | PD_8     | I    | I  | I   |
| Verdicchio spontaneous fermentation | MOS_1    | II   | II | I   |
| Verdicchio spontaneous fermentation | MOS_2    | V    | IV | I   |
| Verdicchio spontaneous fermentation | MOS_3    | I    | I  | I   |
| Verdicchio spontaneous fermentation | MOS_4    | II   | II | I   |
| Verdicchio spontaneous fermentation | MOS_5    | II   | II | I   |
| Verdicchio spontaneous fermentation | MOS_6    | IX   | VI | II  |
| Verdicchio spontaneous fermentation | MOS_7    | II   | II | I   |
| Verdicchio spontaneous fermentation | MOS_8    | II   | II | I   |
| Verdicchio spontaneous fermentation | MOS_9    | III  | II | IV  |
| Verdicchio spontaneous fermentation | MOS_10   | I    | I  | I   |
| Verdicchio spontaneous fermentation | Vop_1    | III  | II | IV  |
| Verdicchio spontaneous fermentation | Vop_2    | III  | II | IV  |
| Winery environment - floor          | P_1      | II   | II | I   |
| Winery environment - floor          | P_2      | II   | II | I   |

|                            |     |    |    |   |
|----------------------------|-----|----|----|---|
| Winery environment - floor | P_3 | II | II | I |
| Winery environment - floor | P_4 | I  | I  | I |
| Winery environment - floor | P_5 | I  | I  | I |
| Winery environment - floor | P_6 | I  | I  | I |
| Winery environment - floor | P_7 | I  | I  | I |
| Winery environment - floor | P_8 | I  | I  | I |

Figure S1. Electrophoresis gels of native *S. cerevisiae* strains. (a) represents the different biotypes (I, II, III, IV, V, VI) obtained by  $\delta 12-21$  analyses. (b) represents the different biotypes (I, II, III, IV) obtained by ISSR-PCR. In both agarose gels, the lane indicated as 100bp represents the molecular weight marker.

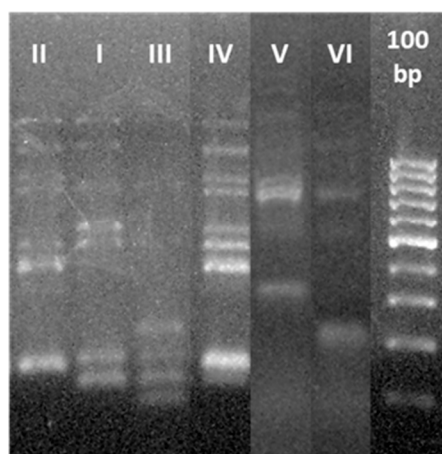

(a)

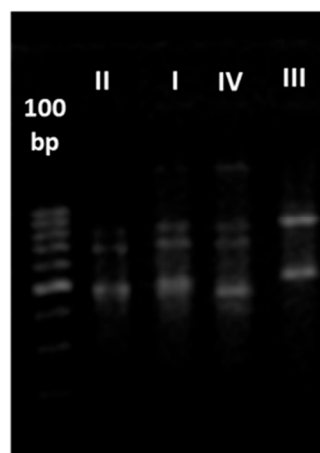

(b)
